# Supplementary material for: The evolution of Canadian research reactors: 1942 to 1992
Source: publisher site journal article supplement (doi:10.18632/aging.205687), 1992-01-01
Supplement: Supplementary file [file aging-v16i7-205687-supplementary-material-SD1.pdf]

SUPPLEMENTARY FIGURES

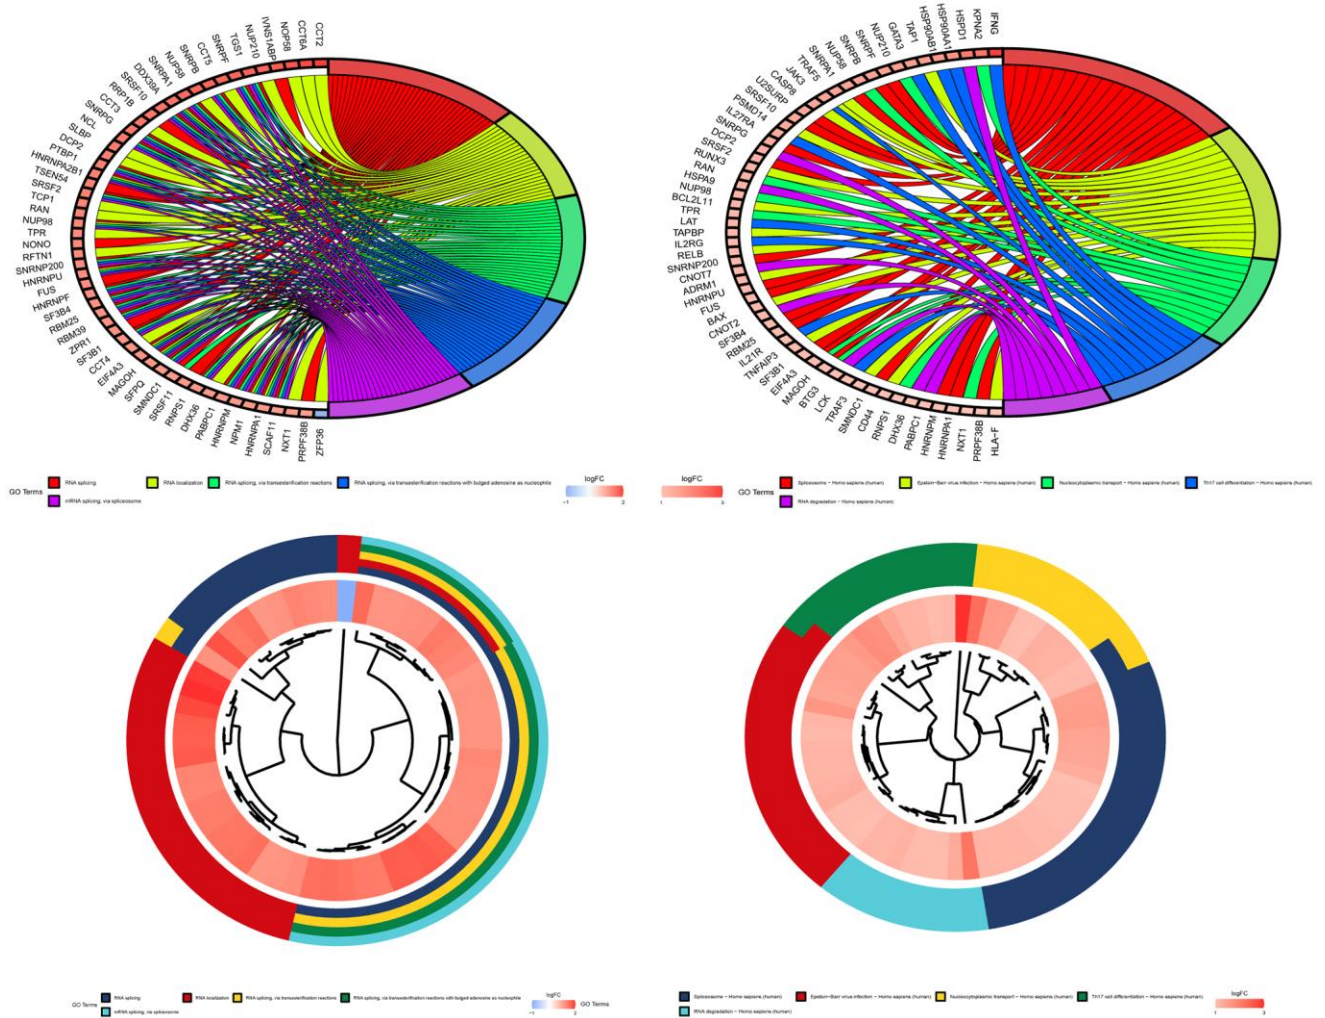

Supplementary Figure 1. Functional enrichment for differentially expressed TCRGs. Concentric circle diagram of KEGG pathway analysis and GO analysis.

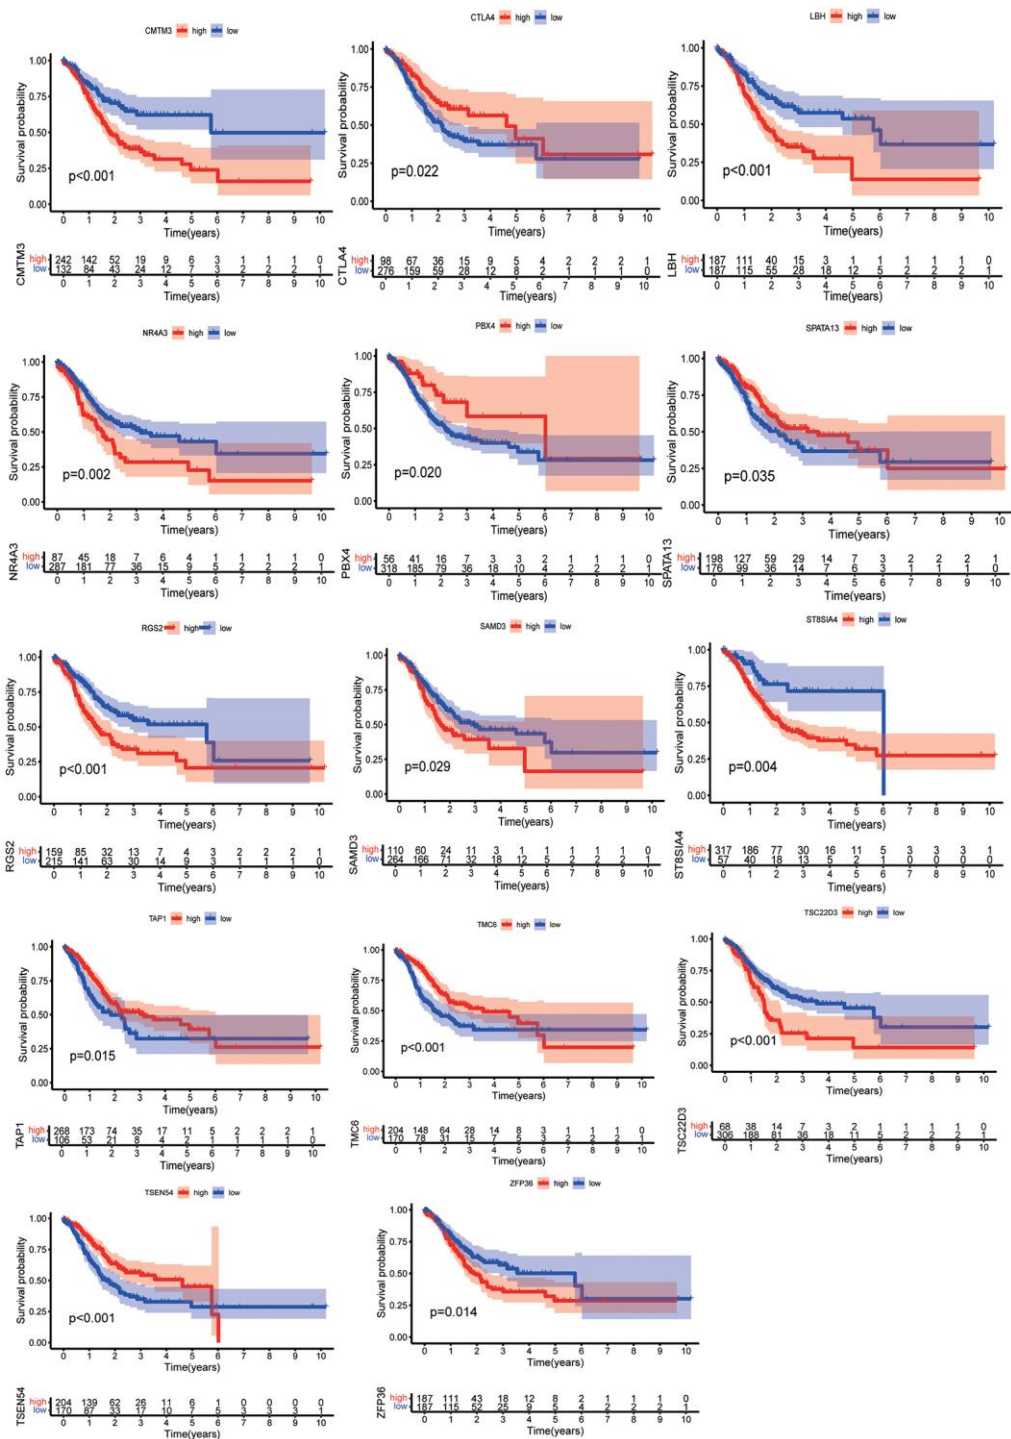

Supplementary Figure 2. K-M curves of single prognostic genes.

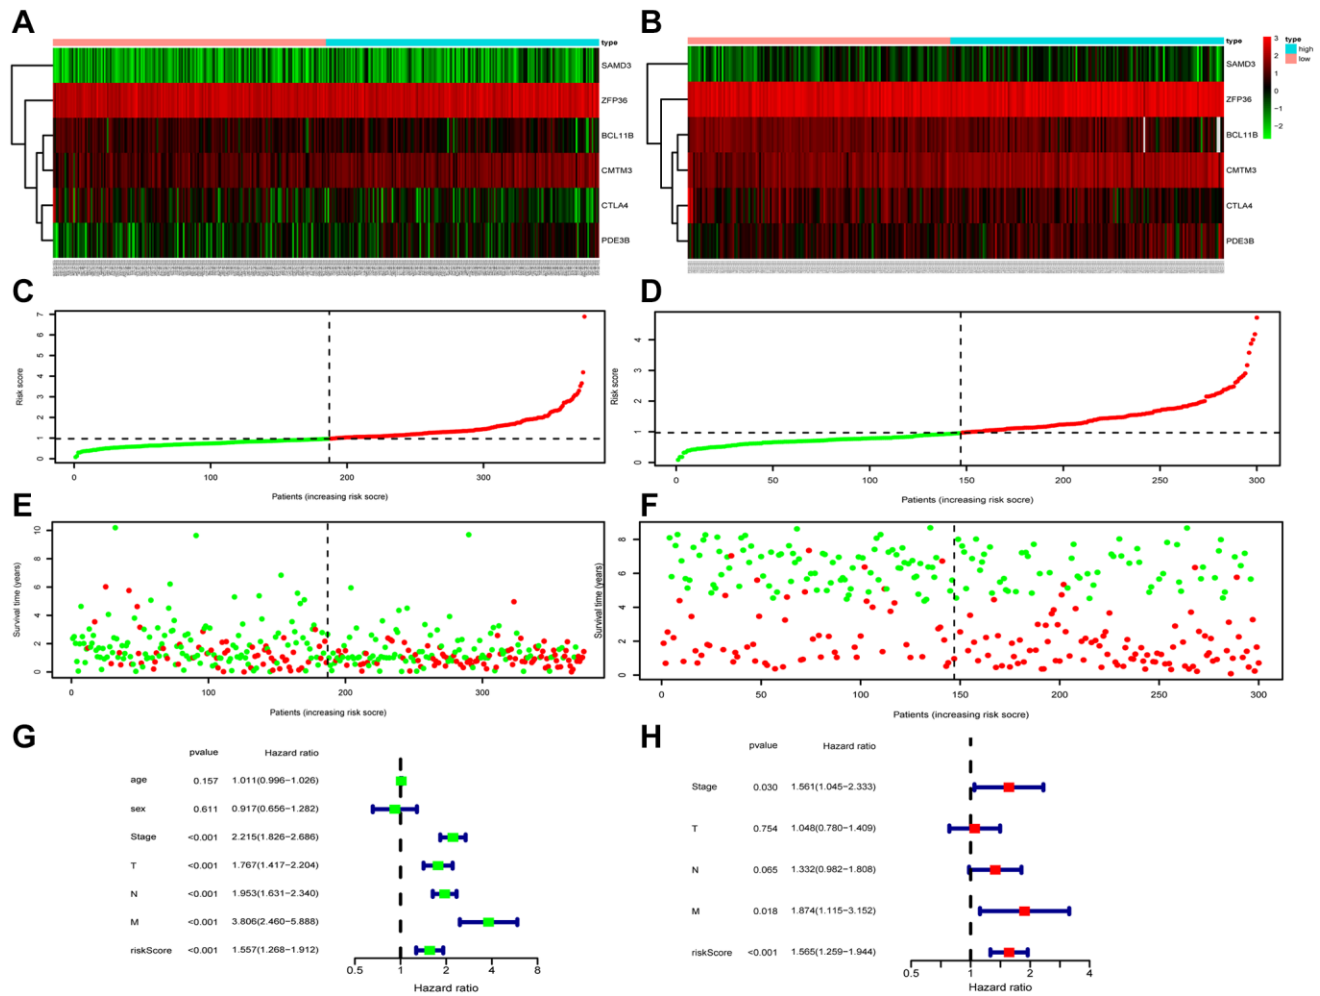

**Supplementary Figure 3. Survival status in different groups and independent prognostic analysis in GSE62254.** Heatmap for the expression characteristics of 6 modeled genes in (A) training set and (B) validation set. Distribution of riskscore in (C) training set and (D) validation set. Distribution of each patient's OS in (E) training set and (F) validation set. (G) Univariate and (H) multivariate Cox analysis of clinical characteristics and risk in validation set.
